# Supplementary material for: The climatology of planetary boundary layer height in China derived from radiosonde and reanalysis data
Source: Copernicus journal article supplement (doi:10.5194/acp-2016-564), 2016-07-11
Supplement: Supplementary file 1 [file acp-2016-564-supplement.pdf]

## *Supplementary materials for*

### **The climatology of planetary boundary layer height in China derived from radiosonde and reanalysis data**

Jianping Guo<sup>1\*</sup>, Yucong Miao<sup>1</sup>, Yong Zhang<sup>2</sup>, Huan Liu<sup>1</sup>, Zhanqing Li<sup>2,3\*</sup>, Wanchun Zhang<sup>1</sup>, Jing He<sup>1</sup>, Mengyun Lou<sup>1</sup>, Yan Yan<sup>1</sup>, Lingen Bian<sup>1</sup>, Panmao Zhai<sup>1</sup>

<sup>1</sup>State Key Laboratory of Severe Weather & Key Laboratory of Atmospheric Chemistry of CMA, Chinese Academy of Meteorological Sciences, Beijing 100081, China

<sup>3</sup>Meteorological Observation Centre, China Meteorological Administration, Beijing, 100081, China

<sup>3</sup>College of Global Change and Earth System Science, Beijing Normal University, Beijing 100875, China

<sup>4</sup>Dept. of Atmospheric & Oceanic Sciences and ESSIC, University of Maryland, College Park, MD 20740, USA

\* To whom all correspondence should be addressed

Dr. Jianping Guo      Email: [jpguocams@gmail.com](mailto:jpguocams@gmail.com)

and Dr. Zhanqing Li      Email: [zli@atmos.umd.edu](mailto:zli@atmos.umd.edu)

## **Contents**

**Figure S1.** Spatial distributions of seasonally averaged ERA-BLH (color shaded) and CMA-BLH (color dots) at (a) 0200 BJT, (b) 0800 BJT, (c) 1400 BJT, and (d) 2000 BJT in spring.

**Figure S2.** Same as Figure S1, but for spatial distributions of BLHs in fall.

**Figure S3.** Same as Figure S1, but for spatial distributions of BLHs in winter.

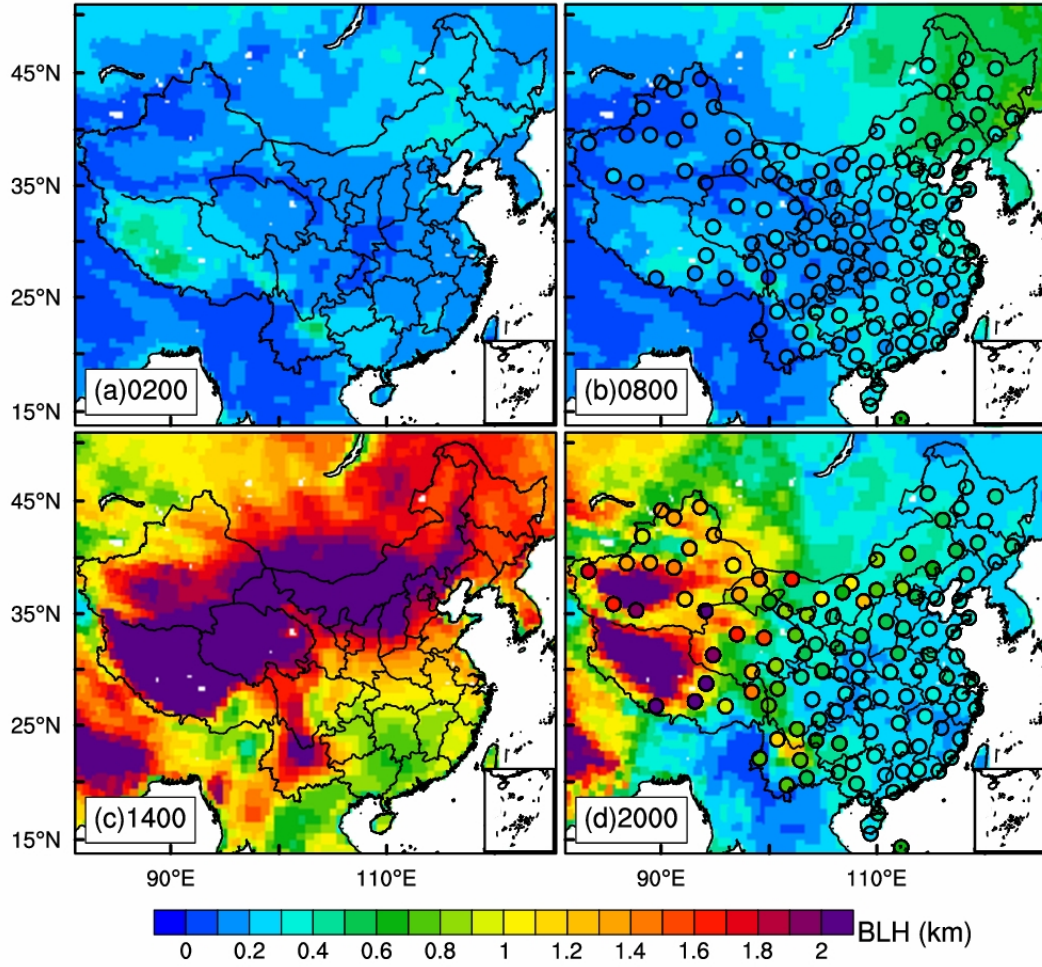

**Figure S1.** Spatial distributions of seasonally averaged ERA-BLH (color shaded) and CMA-BLH (color dots) at (a) 0200 BJT, (b) 0800 BJT, (c) 1400 BJT, and (d) 2000 BJT in spring.

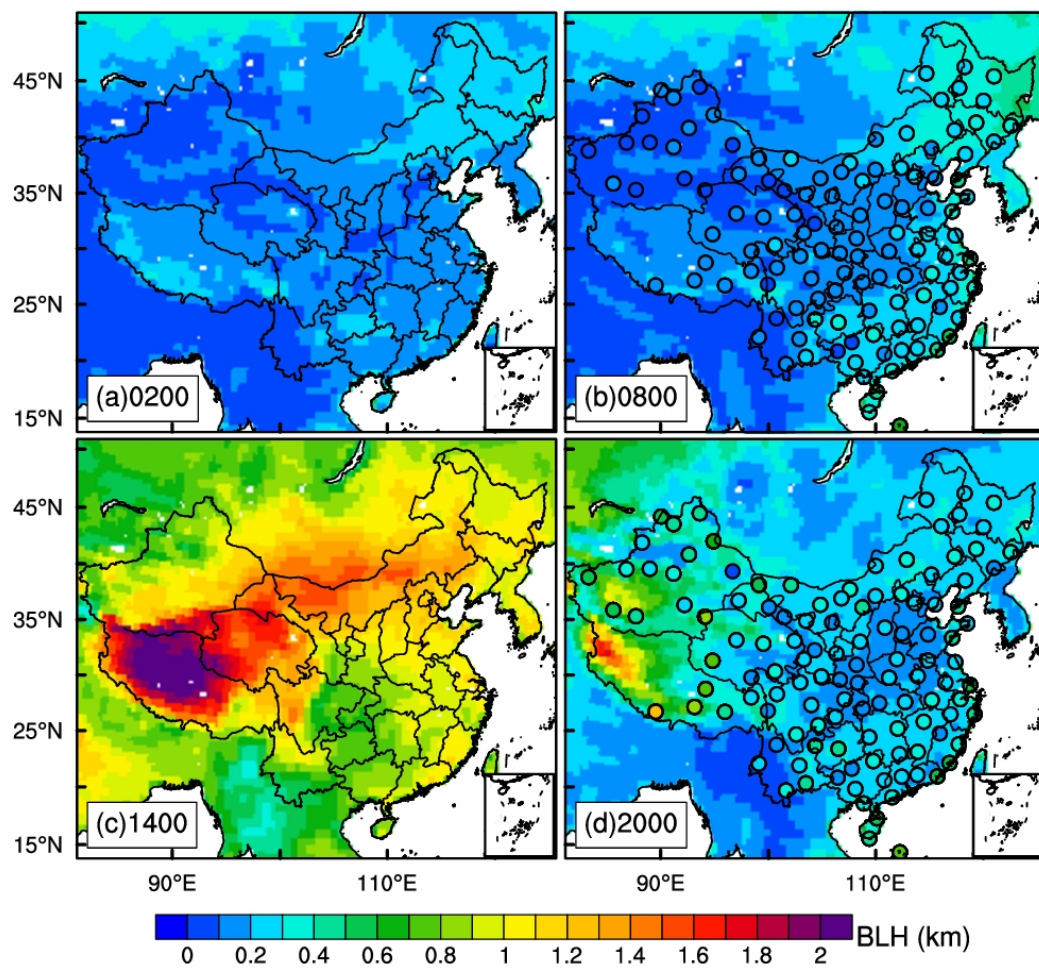

**Figure S2.** Similar as Figure S5, but for spatial distributions of BLHs in fall.

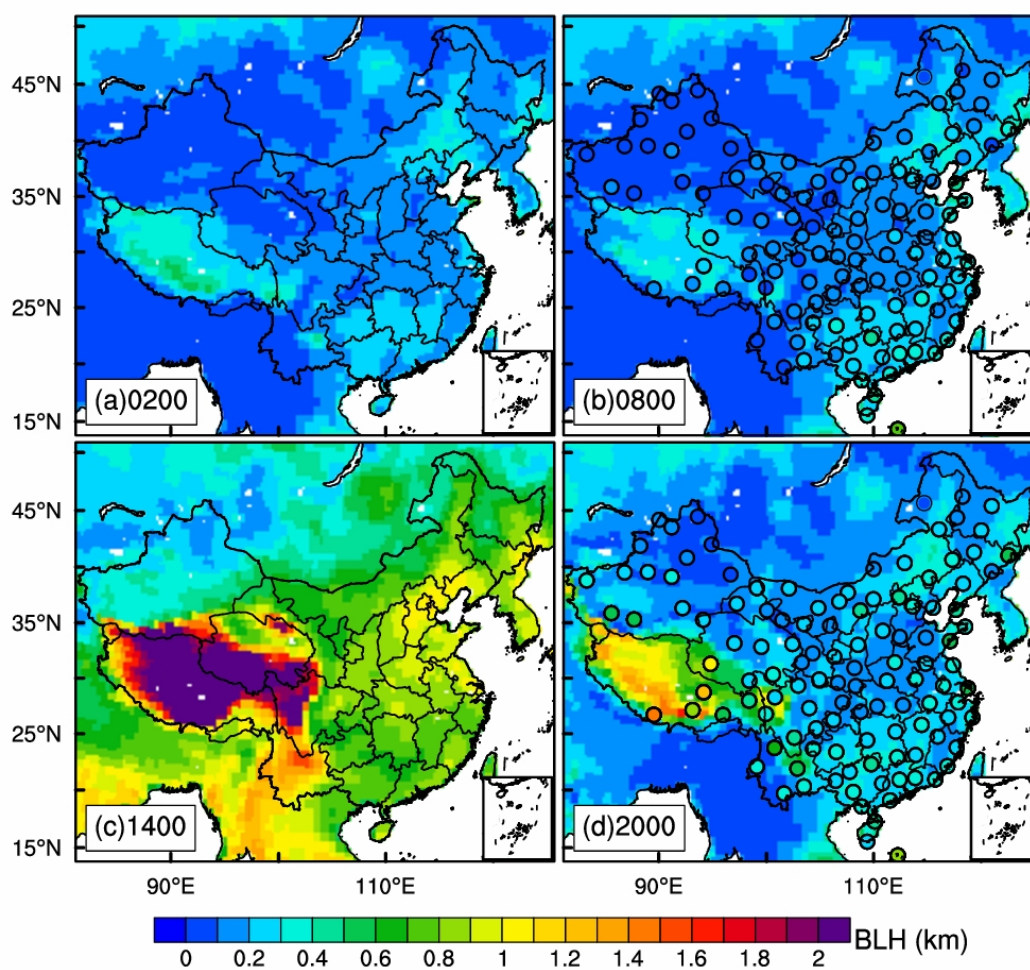

**Figure S3.** Similar as Figure S5, but for spatial distributions of BLHs in winter.
