# Supplementary material for: The climatology of planetary boundary layer height in China derived from radiosonde and reanalysis data
Source: Copernicus journal article supplement (doi:10.5194/acp-2016-564), 2016-07-11
Supplement: Supplementary file [file acp-2016-564-AC2-supplement.pdf]

## **Anonymous Reviewer #2:**

This paper investigates the planetary boundary layer height over many regions in China on a seasonal and diurnal basis. It shows the non-uniformity of the BLH over the country and uses high-resolution radiosonde observations and reanalysis data. Overall this is a good study and fits the scope of ACP and suggestions for revisions have been provided in a supplemental PDF.

*Response: We are quite grateful to referee #2 for his/her positive comments on our manuscript, which are pretty constructive and valuable. Because all these suggestions for revisions raised by the referee are almost all grammar errors or typos, which have been explicitly considered and incorporated into this revision, we will not list here the response one-by-one to each comment or suggestion.*
